# Supplementary material for: Massively Parallel DNA Computing Based on Domino DNA Strand Displacement Logic Gates
Source: PubMed Central journal article supplement — ACS Synth Biol. 2022 Jun 30;11(7):2504–12. doi: 10.1021/acssynbio.2c00270 (PMC9295701; doi:10.1021/acssynbio.2c00270), 2022-06-30
Supplement: sb2c00270_si_004.pdf [file sb2c00270_si_004.pdf]

# Massively parallel DNA computing based on domino DNA strand displacement logic gates

(Supplementary Information)

*Xin Chen<sup>1</sup>, Xinyu Liu<sup>1</sup>, Fang Wang<sup>1</sup>, Sirui Li<sup>1</sup>, Congzhou Chen<sup>2,\*</sup>, Xiaoli Qiang<sup>1,\*</sup> and  
Xiaolong Shi<sup>1,\*</sup>*

<sup>1</sup> Institute of Computing Science and Technology, Guangzhou University, Guangzhou  
510006, China

<sup>2</sup> Key Laboratory of High Confidence Software Technologies, School of Computer  
Science, Peking University, Beijing 100871, China

KEYWORDS: DNA computing, DNA strand displacement, Tic-tac-toe, Domino  
multi-input AND gate

**Table S1 DNA sequence design**

|           |                                     | sequence                                                 |
|-----------|-------------------------------------|----------------------------------------------------------|
| Figure 1a | 1-logic                             | GTGGGTAGGAGTGGTTAGGGAGTATTAGGAGTTTG                      |
|           |                                     | TCCCTAACCACTCCTACCACTAAAC                                |
|           | 2-logic                             | GAGTATTAGGAGTTTGACGA                                     |
|           |                                     | GTGGTAAGGTATAAGGTTAGAAGTTTGAATTGGTG                      |
|           |                                     | TCTAACCTTATACCTTACCACGTCGTCAAACCTCTAATACTCCCTAA          |
|           | 3-logic                             | GAAGTTTGAATTGGTGGTGT                                     |
|           |                                     | CTCATTATCAAGCTGAGATGAGGAAGATAGTGGA                       |
|           |                                     | CATCTCAGCTTGATAATGGAGAACACCACCAATTCAAACCTTCTAACC         |
|           | reporter                            | TGAGGAAGATAGTGGA-FAM-6'3                                 |
|           |                                     | 5'BHQ1-TCCACTATCTTCCTCATCTCA                             |
| input a   | GTTTAGTGGGTAGGAGTGGTTAGGGA          |                                                          |
| input b   | ACGACGTGGTAAGGTATAAGGTTAGA          |                                                          |
| input c   | GTGTTCTCCATTATCAAGCTGAGATG          |                                                          |
| Figure 1b | input a                             | ATGTACGAGCCTATTAAT                                       |
|           | input b                             | GAGAGGGAAGAGGGTAGAG                                      |
|           | input c                             | TTGCCGTACCTATTAATTC                                      |
|           | Logic gate                          | GTACCTATTAATTCGAGAG                                      |
|           |                                     | GGAAGAGGGTAGAGATGTA                                      |
|           |                                     | CGAGCCTATTAATGTCCTTGTCACGTC                              |
|           |                                     | ATTTAATAGGCTCGTACATCTCTACCCTCTCCCTCTCGAATTAATAGGTACGGCAA |
| reporter  | GTCCTTGTCACGTC-FAM-6'3              |                                                          |
|           | 5'BHQ1-GACGTGACAAGGACATTTAATAGGCTCG |                                                          |
| Figure 2a | input a                             | ATGTACGAGCCTATTAAT                                       |
|           | input b                             | GAGAGGGAAGAGGGTAGAG                                      |

|           |            |                                                                    |
|-----------|------------|--------------------------------------------------------------------|
|           | input c    | AATAAAGCACTACAGAACC                                                |
|           | Logic gate | AGCACTACAGAACCGAGAG                                                |
|           |            | GGAAGAGGGTAGAGATGTA                                                |
|           |            | CGAGCCTATTAATGTCCTTGTCACGTC                                        |
|           |            | ATTTAATAGGCTCGTACATCTCTACCCTCTTCCCTCTCGGTTCTGTAGTGCTTTATT          |
|           | reporter   | GTCCTTGTCACGTC-FAM-6'3                                             |
|           |            | 5'BHQ1-GACGTGACAAGGACATTTAATAGGCTCG                                |
| Figure 2b | input a    | ATGTACGAGCCTATTAAT                                                 |
|           | input b    | TTGCCGTACCTATTAATC                                                 |
|           | input c    | GTGTTCTCCATTATCAAGC                                                |
|           | Logic gate | GTACCTATTAATTC GTGTT                                               |
|           |            | CTCCATTATCAAGC ATGTA                                               |
|           |            | CGAGCCTATTAAT-3'BHQ1                                               |
|           |            | 5'6-FAM-ATTTAATAGGCTCGTACATGCTTGATAATGGAGAACACGAATT AATAGGTACGGCAA |

**Table S2 Sequence design used in tic-tac-toe games**

| position | Logic gate | sequence                                                                  |
|----------|------------|---------------------------------------------------------------------------|
| 1        | gate24     | CGAGCCTATTAAAT-3'BHQ1                                                     |
|          |            | 5'6-FAM-ATTTAATAGGCTCGTACAT                                               |
| 112      | gate23     | GTGGTAAGGTATAA GTGTT                                                      |
|          |            | CTCCATTATCAAGC GTTTA                                                      |
|          |            | GTGGGTAGGAGTGG-3'BHQ1                                                     |
|          |            | 5'6-FAM-<br>CCACTCCTACCCACTAAACGCTTGATAATGGAGAACACTTATAC<br>CTTACCACGTCGT |
|          | gate18     | GTACCTATTAATTCGAGAG                                                       |
|          |            | GGAAGAGGGTAGAGATGTA                                                       |
|          |            | CGAGCCTATTAAAT-3'BHQ1                                                     |
|          |            | 5'6-FAM-<br>ATTTAATAGGCTCGTACATCTCTACCCTCTCCCTCTCGAATTAA<br>TAGGTACGGCAA  |
|          | gate17     | GTACCTATTAATTC GTGTT                                                      |
|          |            | CTCCATTATCAAGC ATGTA                                                      |
|          |            | CGAGCCTATTAAAT-3'BHQ1                                                     |
|          |            | 5'6-FAM-<br>ATTTAATAGGCTCGTACATGCTTGATAATGGAGAACACGAATTA<br>ATAGGTACGGCAA |
| 3        | gate22     | GTGGTAAGGTATAAGTTTA                                                       |
|          |            | GTGGGTAGGAGTGG-3'BHQ1                                                     |
|          |            | 5'6-FAM-CCACTCCTACCCACTAAACTTATACCTTACCACGTCGT                            |
|          | gate25     | GTACCTATTAATTCATGTA                                                       |
|          |            | CGAGCCTATTAAAT-3'BHQ1                                                     |
|          |            | 5'6-FAM-ATTTAATAGGCTCGTACATGAATTAATAGGTACGGCAA                            |

|   |        |                                                                           |
|---|--------|---------------------------------------------------------------------------|
| 4 | gate21 | GTGGGTAGGAGTGG-3'BHQ1                                                     |
|   |        | 5'6-FAM-CCACTCCTACCCACTAAAC                                               |
| 6 | gate1  | AGCACTACAGAACCGTTTA                                                       |
|   |        | GTGGGTAGGAGTGG-3'BHQ1                                                     |
|   |        | 5'6-FAM-CCACTCCTACCCACTAAACGGTTCTGTAGTGCTTACTG                            |
|   | gate2  | ATTGGACCCGTGAGGTTTA                                                       |
|   |        | GTGGGTAGGAGTGG-3'BHQ1                                                     |
|   |        | 5'6-FAM-CCACTCCTACCCACTAAACCTCACGGGTCCAATTCTCA                            |
|   | gate3  | CTCCATTATCAAGCGTTTA                                                       |
|   |        | GTGGGTAGGAGTGG-3'BHQ1                                                     |
|   |        | 5'6-FAM-CCACTCCTACCCACTAAACGCTTGATAATGGAGAACAC                            |
|   | gate4  | GGAAGAGGGTAGAGGTTTA                                                       |
|   |        | GTGGGTAGGAGTGG-3'BHQ1                                                     |
|   |        | 5'6-FAM-CCACTCCTACCCACTAAACCTCTACCCTCTCCCTCTC                             |
|   | gate5  | GTACCTATTAATTCGTTTA                                                       |
|   |        | GTGGGTAGGAGTGG-3'BHQ1                                                     |
|   |        | 5'6-FAM-CCACTCCTACCCACTAAACGAATTAATAGGTACGGCAA                            |
| 7 | gate6  | GTGGTAAGGTATAACAGTA                                                       |
|   |        | AGCACTACAGAACCGTTTA                                                       |
|   |        | GTGGGTAGGAGTGG-3'BHQ1                                                     |
|   |        | 5'6-FAM-<br>CCACTCCTACCCACTAAACGGTTCTGTAGTGCTTACTGTTATAC<br>CTTACCACGTCGT |
|   | gate7  | GTGGTAAGGTATAAGAGAG                                                       |
|   |        | GGAAGAGGGTAGAGGTTTA                                                       |
|   |        | GTGGGTAGGAGTGG-3'BHQ1                                                     |

|   |        |                                                                                              |
|---|--------|----------------------------------------------------------------------------------------------|
|   |        | 5'6-FAM-<br>CCACTCCTACCCACTAAACCTCTACCCTCTCCCTCTTTATAACC<br>TTACCACGTCGT                     |
|   | gate8  | GTACCTATTAATTCACGAC                                                                          |
|   |        | GTGGTAAGGTATAAGTTTA                                                                          |
|   |        | GTGGGTAGGAGTGG-3'BHQ1                                                                        |
|   |        | 5'6-FAM-<br>CCACTCCTACCCACTAAACTTATACCTTACCACGTCGTGAATTA<br>ATAGGTACGGCAA                    |
|   | gate16 | GTACCTATTAATTCACGAC                                                                          |
|   |        | GTGGTAAGGTATAAATGTA                                                                          |
|   |        | CGAGCCTATTAAT-3'BHQ1                                                                         |
|   |        | 5'6-FAM-<br>ATTTAATAGGCTCGTACATTTATACCTTACCACGTCGTGAATTA<br>ATAGGTACGGCAA                    |
|   | gate19 | GTACCTATTAATTCCAGTA                                                                          |
|   |        | AGCACTACAGAACCATGTA                                                                          |
|   |        | CGAGCCTATTAAT-3'BHQ1                                                                         |
|   |        | 5'6-FAM-<br>ATTTAATAGGCTCGTACATGGTTCTGTAGTGCTTACTGGAATTA<br>ATAGGTACGGCAA                    |
| 8 | gate9  | GTACCTATTAATTCACGAC                                                                          |
|   |        | GTGGTAAGGTATAAGTGTT                                                                          |
|   |        | CTCCATTATCAAGCGTTTA                                                                          |
|   |        | GTGGGTAGGAGTGG-3'BHQ1                                                                        |
|   |        | 5'6-FAM-<br>CCACTCCTACCCACTAAACGCTTGATAATGGAGAACACTTATAC<br>CTTACCACGTCGTGAATTAATAGGTACGGCAA |
| 9 | gate10 | GTGGTAAGGTATAAGAGAG                                                                          |
|   |        | GGAAGAGGGTAGAGGTGTT                                                                          |

|       |         |                                                                                              |
|-------|---------|----------------------------------------------------------------------------------------------|
|       |         | CTCCATTATCAAGCGTTA                                                                           |
|       |         | GTGGGTAGGAGTGG-3'BHQ1                                                                        |
|       |         | 5'6-FAM-<br>CCACTCCTACCCACTAAACGCTTGATAATGGAGAACACCTCTAC<br>CCTCTTCCCTCTCTTATACCTTACCACGTCGT |
|       | gate11  | AGCACTACAGAACCATGTA                                                                          |
|       |         | CGAGCCTATTAAAT-3'BHQ1                                                                        |
|       |         | 5'6-FAM-ATTTAATAGGCTCGTACATGGTTCTGTAGTGCTTACTG                                               |
|       | gate12  | ATTGGACCCGTGAGATGTA                                                                          |
|       |         | CGAGCCTATTAAAT-3'BHQ1                                                                        |
|       |         | 5'6-FAM-ATTTAATAGGCTCGTACATCTCACGGGTCCAATTCTCA                                               |
|       | gate13  | GTGGTAAGGTATAAATGTA                                                                          |
|       |         | CGAGCCTATTAAAT-3'BHQ1                                                                        |
|       |         | 5'6-FAM-ATTTAATAGGCTCGTACATTTATACCTTACCACGTCGT                                               |
|       | gate14  | CTCCATTATCAAGCATGTA                                                                          |
|       |         | CGAGCCTATTAAAT-3'BHQ1                                                                        |
|       |         | 5'6-FAM-ATTTAATAGGCTCGTACATGCTTGATAATGGAGAACAC                                               |
|       | gate15  | GGAAGAGGGTAGAGATGTA                                                                          |
|       |         | CGAGCCTATTAAAT-3'BHQ1                                                                        |
|       |         | 5'6-FAM-ATTTAATAGGCTCGTACATCTCTACCCTCTTCCCTCTC                                               |
| Input | input 1 | GTTTAGTGGGTAGGAGTGG                                                                          |
|       | input 2 | CAGTAAGCACTACAGAACC                                                                          |
|       | input 3 | TGAGAATTGGACCCGTGAG                                                                          |
|       | input 4 | ATGTACGAGCCTATTAAAT                                                                          |
|       | input 6 | ACGACGTGGTAAGGTATAA                                                                          |
|       | input 7 | GTGTTCTCCATTATCAAGC                                                                          |
|       | input 8 | GAGAGGGAAGAGGGTAGAG                                                                          |
|       | input 9 | TTGCCGTACCTATTAATTC                                                                          |

**table S3** the Melt profile of the sequence used in the tic-tac-toe game. The Melt profile is measured by NUPACK.

|           |         |       |                     |                |
|-----------|---------|-------|---------------------|----------------|
| Position1 |         |       |                     |                |
|           | toehold | GTTTA | information domains | GTGGGTAGGAGTGG |
| Position2 |         |       |                     |                |
|           | toehold | CAGTA | information domains | AGCACTACAGAACC |
| Position3 |         |       |                     |                |
|           | toehold | TGAGA | information domains | ATTGGACCCGTGAG |
| Position4 |         |       |                     |                |
|           | toehold |       | information domains |                |



|           |                     |       |                     |                |
|-----------|---------------------|-------|---------------------|----------------|
|           | toehold             | ATGTA | information domains | CGAGCCTATTAAT  |
| Position6 | <p>Melt profile</p> |       | <p>Melt profile</p> |                |
|           | toehold             | ACGAC | information domains | GTGGTAAGGTATAA |
| Position7 | <p>Melt profile</p> |       | <p>Melt profile</p> |                |
|           | toehold             | GTGTT | information domains | CTCCATTATCAAGC |
| Position8 | <p>Melt profile</p> |       | <p>Melt profile</p> |                |
|           | toehold             | GAGAG | information domains | GGAAGAGGGTAGAG |
| Position9 | <p>Melt profile</p> |       | <p>Melt profile</p> |                |
|           | toehold             | TTGCC | information domains | GTACCTATTAATTC |

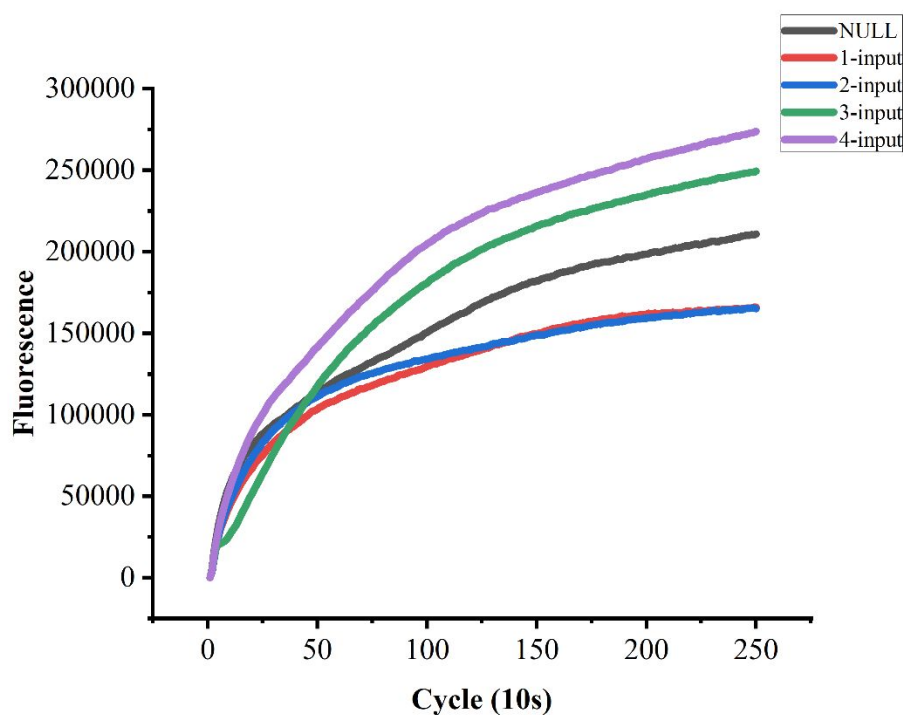

**Figure S1 Fluorescence Reporter Results of a Four-Conditional AND-Gate Computational System Implemented in a Multilevel Cascade Approach.** A larger number of cascades leads to more significant leakage problems. The total value of the fluorescence response for the input of the three signals was approximately 95% of the value when all four signals were present.

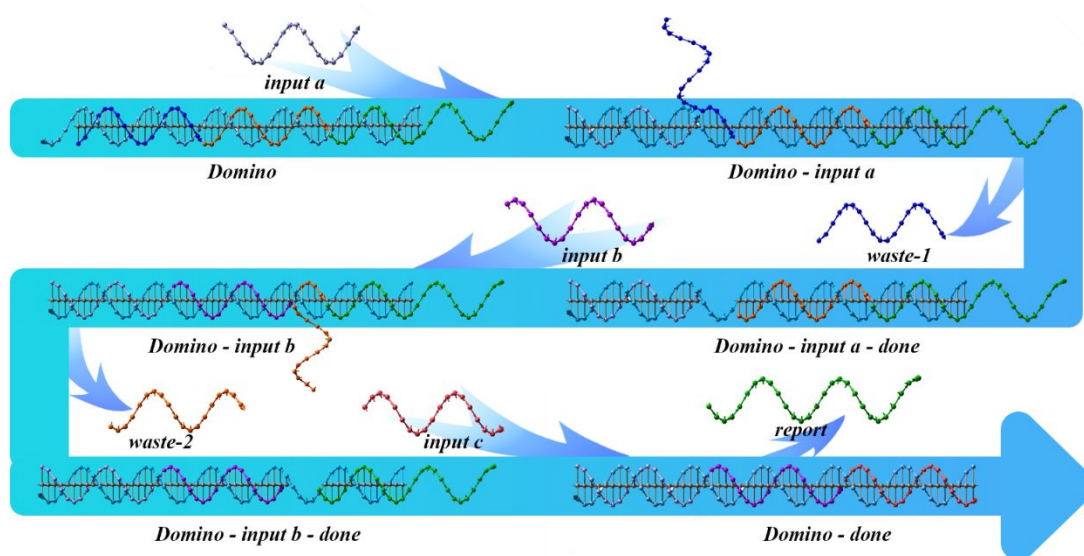

**Figure S2. Three-condition domino AND gate replacement process.** The three-condition replacement process can be divided into five stages: "Domino" is the initial state of the domino logic gate, input "input a" into it, and "input a" is first combined with the exposed toehold field  $t_a^*$ , and then replaced out  $d_a$ , namely This is the "Domino-input a" stage. The  $t_b$  falls off due to the molecule's free energy, "waste-1" is completely replaced, and the toehold domain  $t_b$  is exposed, which is the "Domino-input a-done" phase. After input "input b", "Domino-input b" is similar to "Domino-input a", and "Domino-input b-done" is similar to "Domino-input a-done". "waste-2" is completely replaced, and the toehold domain  $t_c^*$  is exposed. When inputting "input c", "input c" is first combined with toehold domain  $t_c$ , and then the report is completely replaced. It is the "Domino-done" stage, which is the waste in Figure 1b.

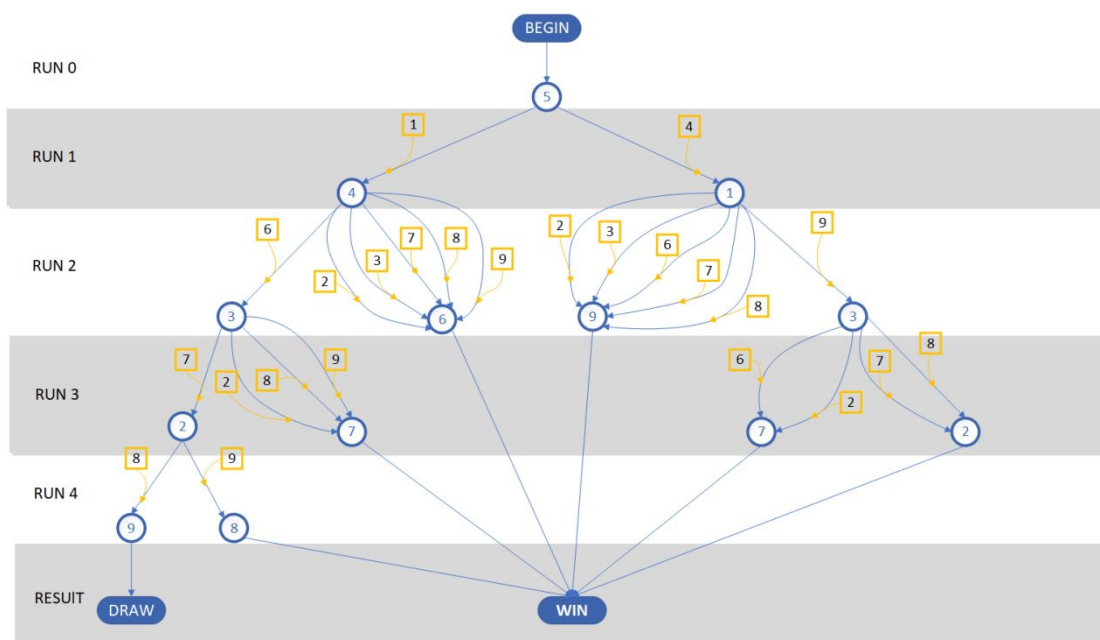

**Figure S3 The game tree for tic-tac-toe.** The blue circles represent bots, and the yellow boxes represent players. According to the strategy of MAYA-1, the first step of the robot is in the middle, and the default is RUN 0. In each round after that, each step of the robot can be determined by all the points that the player has placed on the path.

$$\begin{array}{r}
\begin{array}{c} \underbrace{i_4}_{24} \Rightarrow \text{position 1} \\ \underbrace{(i_1 \wedge i_6 \wedge i_7)}_{23} \parallel \underbrace{(i_4 \wedge i_9 \wedge i_7)}_{17} \parallel \underbrace{(i_4 \wedge i_9 \wedge i_8)}_{18} \Rightarrow \text{position 2} \\ \underbrace{(i_1 \wedge i_6)}_{22} \parallel \underbrace{(i_4 \wedge i_9)}_{25} \Rightarrow \text{position 3} \\ \underbrace{i_1}_{21} \Rightarrow \text{position 4} \\ \underbrace{1}_{20} \Rightarrow \text{position 5} \\ \underbrace{(i_1 \wedge i_2)}_1 \parallel \underbrace{(i_1 \wedge i_3)}_2 \parallel \underbrace{(i_1 \wedge i_7)}_3 \parallel \underbrace{(i_1 \wedge i_8)}_4 \parallel \underbrace{(i_1 \wedge i_9)}_5 \Rightarrow \text{position 6} \\ \underbrace{(i_1 \wedge i_6 \wedge i_2)}_6 \parallel \underbrace{(i_1 \wedge i_6 \wedge i_8)}_7 \parallel \underbrace{(i_1 \wedge i_6 \wedge i_9)}_8 \parallel \underbrace{(i_4 \wedge i_9 \wedge i_6)}_{16} \parallel \underbrace{(i_4 \wedge i_9 \wedge i_2)}_{19} \Rightarrow \text{position 7} \\ \underbrace{i_1 \wedge i_6 \wedge i_7 \wedge i_9}_9 \Rightarrow \text{position 8} \\ \underbrace{(i_1 \wedge i_6 \wedge i_7 \wedge i_8)}_{10} \parallel \underbrace{(i_4 \wedge i_2)}_{11} \parallel \underbrace{(i_4 \wedge i_3)}_{12} \parallel \underbrace{(i_4 \wedge i_6)}_{13} \parallel \underbrace{(i_4 \wedge i_7)}_{14} \parallel \underbrace{(i_4 \wedge i_8)}_{15} \Rightarrow \text{position 9} \end{array}
\end{array}$$

**Figure S4 Implementation strategy of the tic-tac-toe game.** According to the implementation strategy of the MAYA-I robot, the robot can make judgments based on the player's chess position, and the judgment basis is shown in the figure. The robot's judgment for each position is determined by a disjunctive paradigm. Each parenthesis is a logic AND gate, and the number below is the logic gate number. For example, when the player's chess position is 1, 6, and 7, the robot makes a judgment on the position 2.

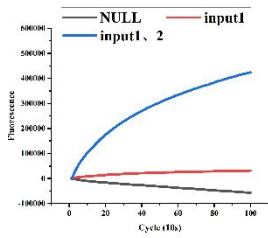

gate 1

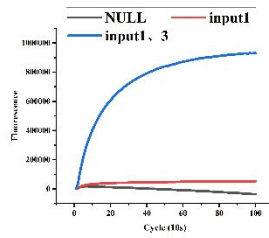

gate 2

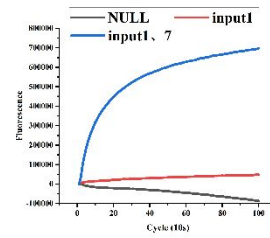

gate 3

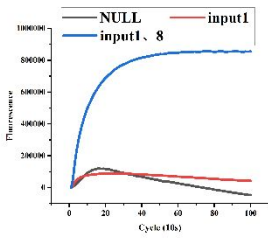

gate 4

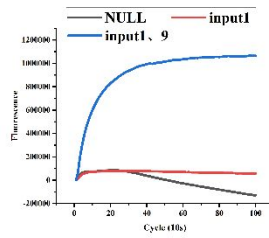

gate 5

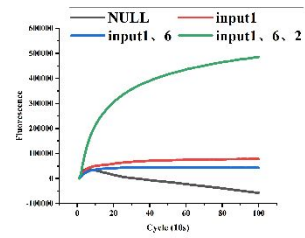

gate 6

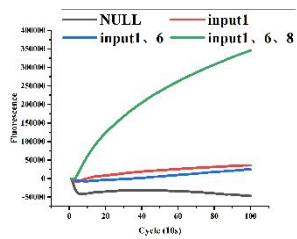

gate 7

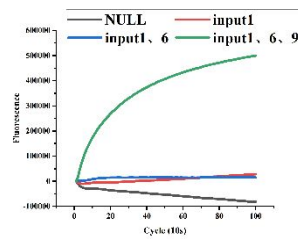

gate 8

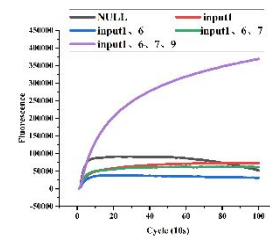

gate 9

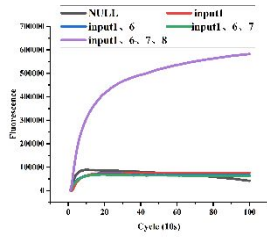

gate 10

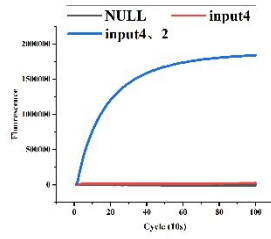

gate 11

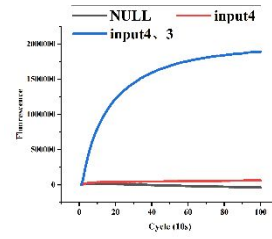

gate 12

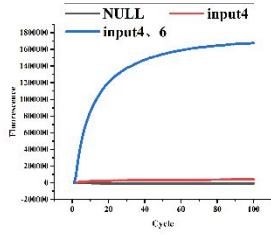

gate 13

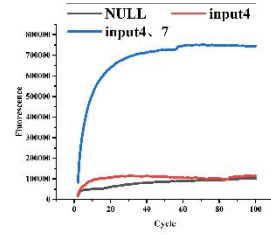

gate 14

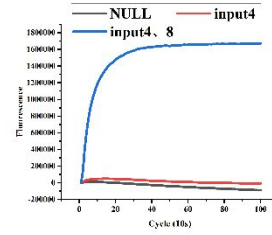

gate 15

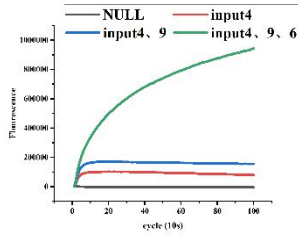

gate 16

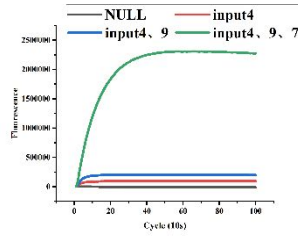

gate 17

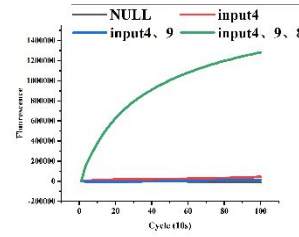

gate 18

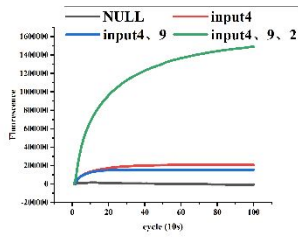

gate 19

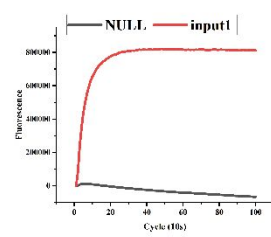

gate 21

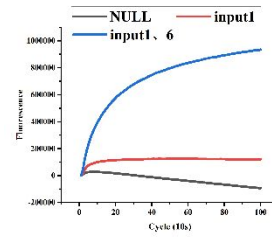

gate 22

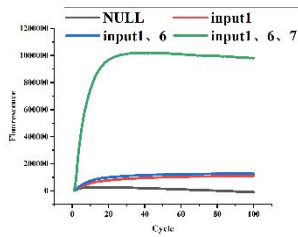

gate 19

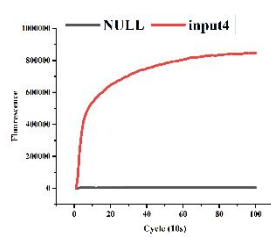

gate 21

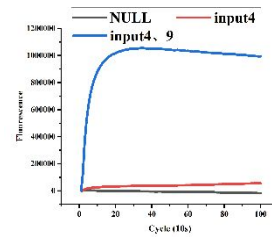

gate 22

gate 23

gate 24

gate 25

**Figure S5 Fluorescence detection results of Tic-tac-toe game logic gates.** We tested the logic gates used in the tic-tac-toe game in separate test tubes. The results show that the logic gates all work properly. And the difference in the fluorescence signal of domino logic gates containing positions 4 and 9 was generally higher than that of domino logic gates containing positions 1 and 6.
